# Supplementary material
Source: publisher figshare collection journal article supplement (https://acs.figshare.com/ndownloader/files/6055971)
Supplement: Supplementary file 1 [file 6055971]

## Supporting Information

### Characterization of Lipid-Based Hexosomes as Versatile Vaccine Carriers

*Leticia Rodrigues<sup>†</sup>, Konstantinos Kyriakos<sup>‡</sup>, Fabian Schneider<sup>§</sup>, Hendrik Dietz<sup>§</sup>, Gerhard Winter<sup>†</sup>, Christine M. Papadakis<sup>‡</sup>, and Madlen Hubert<sup>†,||,\*</sup>*

<sup>†</sup>Department of Pharmacy, Pharmaceutical Technology and Biopharmacy, Ludwig-Maximilians-Universität München, Butenandtstraße 5-13, DE-81377 Munich, Germany

<sup>‡</sup>Physics Department, Soft Matter Physics Group, Technische Universität München, James-Franck-Straße 1, DE-85748 Garching, Germany

<sup>§</sup>Physics Department and Institute for Advanced Study, Walter Schottky Institute, Technische Universität München, Am Coulombwall 4a, DE-85748 Garching, Germany

#### Present Addresses

<sup>||</sup>Department of Integrative Medical Biology, Umeå University, 901 87 Umeå, Sweden.

\*Corresponding author: Department of Integrative Medical Biology, Umeå University, 901 87 Umeå, Sweden, E-mail: madlen.hubert@umu.se, Phone: +46 73 6737781.

This material is available free of charge via the Internet at <http://pubs.acs.org>.

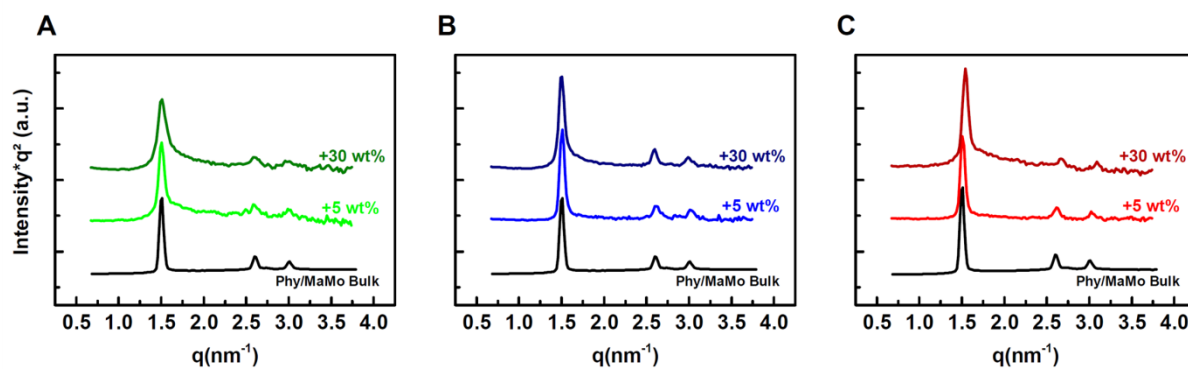

**Figure S1.** Structure characterization using SAXS of Phy/MaMo (14 wt%) formulations containing poloxamer 407 (A), Pluronic F108 (B), and Myrj 59 (C) at 5 and 30 wt% of total lipid. The black curve represents the non-dispersed bulk phase without stabilizer. Measurements were performed at 25°C. The curves were vertically shifted for clarity.

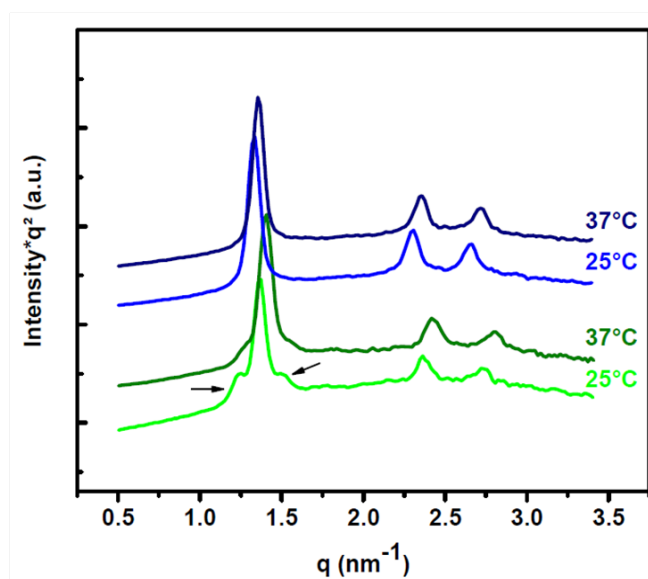

**Figure S2.** Effect of the headgroup dimension on the internal structure of Phy/MaMo (14 wt%) hexosomes stabilized with 10 wt% poloxamer 407. SAXS data is displayed for hexosomes containing the same molar concentration (ca. 14 mol%) of DDA (green) and Dotap (blue) at 25°C and 37°C. Arrows indicate perturbation of the pure HII peak profile. The curves were vertically shifted for clarity.

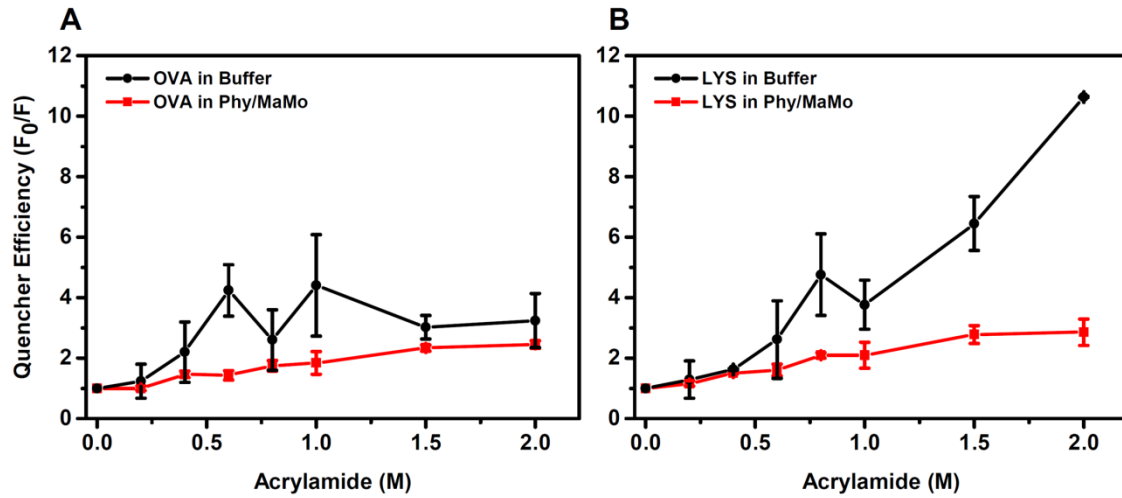

**Figure S3.** Tryptophan accessibility assay with acrylamide in Phy/MaMo (14 wt%) hexosomes stabilized with 25 wt% poloxamer 407, and loaded with 0.1 wt% (of total lipid) ovalbumin (A) or lysozyme (B). Unquenched protein ( $F_0$ ); Quenched protein ( $F$ ). Data is shown as mean  $\pm$  SD of two independent experiments performed in triplicate.
